# Supplementary material for: A Reliable Regeneration Method in Genome-Editable Bell Pepper ‘Dempsey’
Source: MDPI journal article supplement (doi:10.3390/horticulturae7090317), 2021-09-16
Supplement: s1 [file s1]

## Dempsey WT

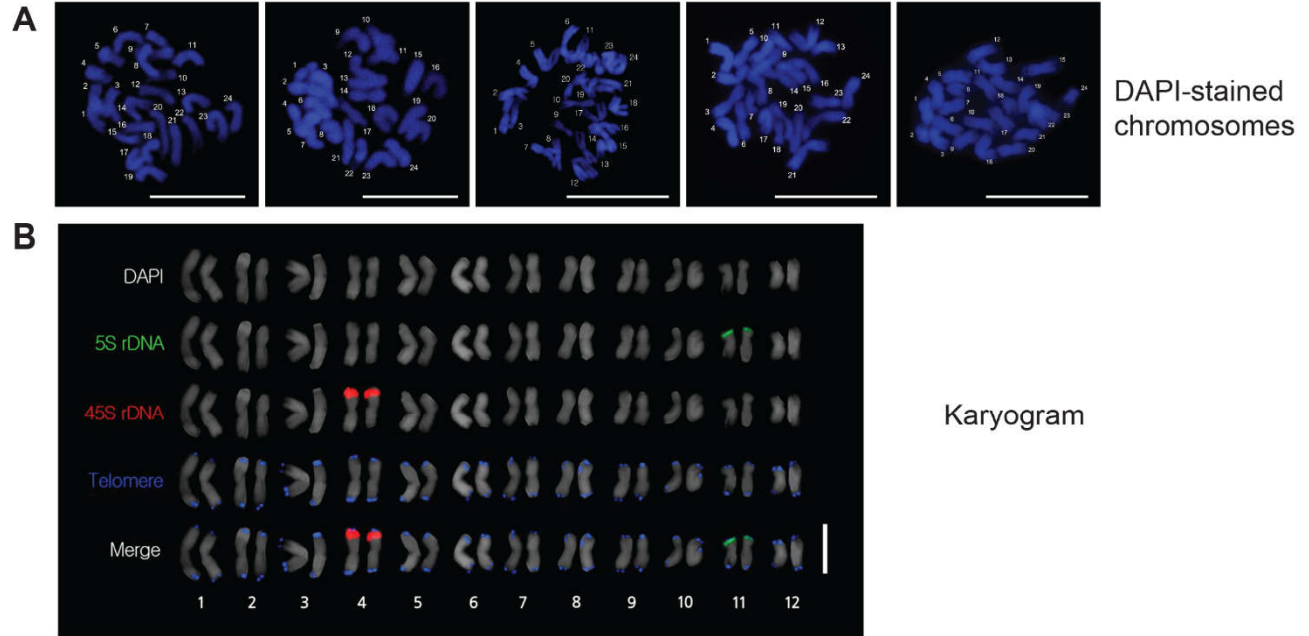

## Dempsey Regenerants

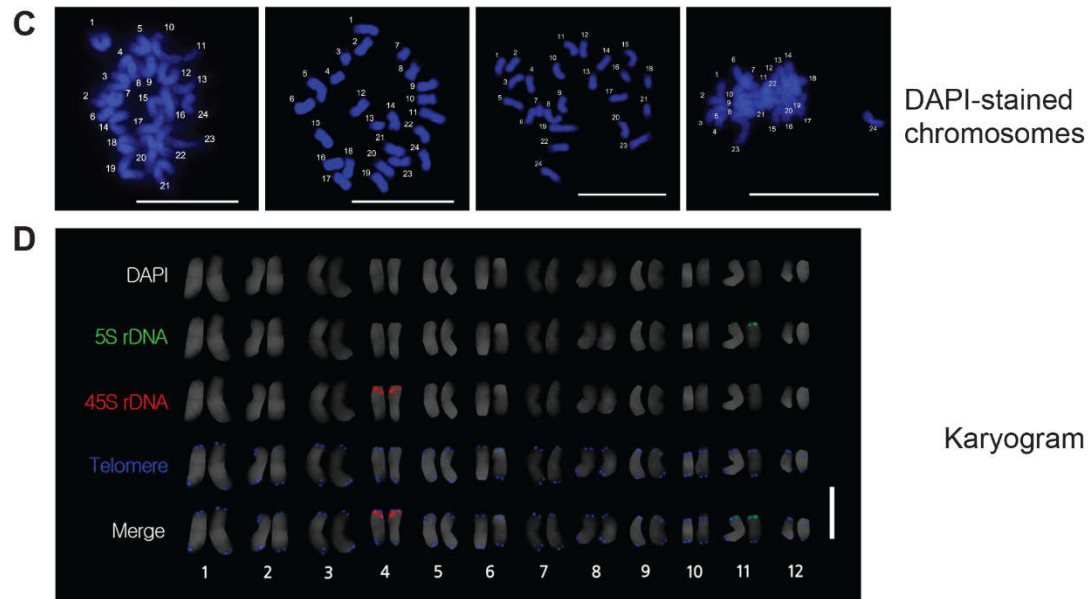

**Figure S1.** Cytogenetic analysis and karyogram of chromosomes from the 'Dempsey' WT and regenerative (R1). Representative images of DAPI-stained chromosomes from the Dempsey wild type (**A**). Karyogram of chromosomes from the wild-type Dempsey cultivar (**B**). Representative images of DAPI-stained chromosomes from the R1 (**C**). Karyogram of chromosomes from the R1 (**D**); scale bars = 10  $\mu$ m. (**A,C**) All specimens exhibited the same number of DAPI-stained chromosomes,  $2n = 24$ . The numbers 1 through 24 indicate chromosome count. (**B,D**) Karyograms by fluorescence *in situ* hybridization (FISH) in the wild-type and R1. Green, 5S rDNA; Red, 45S rDNA; Blue, Telomeric repeat.

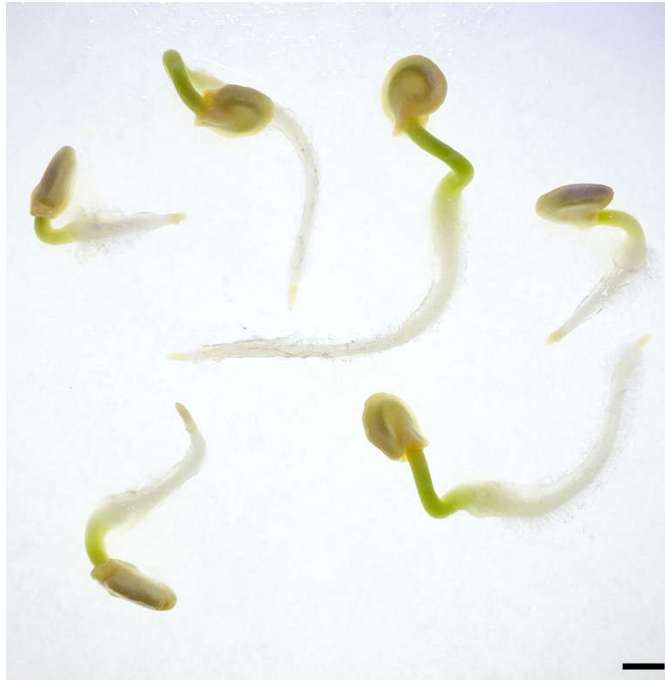

**Figure S2.** Germination analysis of the 'Dempsey' regenerant (R2). A representative image of nine-day-old 'Dempsey' regenerant R2 seedlings on a wet filter paper, scale bar = 1 mm.

**Table S1.** The summary of regeneration with three types of 'Dempsey' explants from eight biological replicates.

| Biological Replicates | Number of Plant | Types of Explant | Number of Explants | Number of Shooting | Shooting Rate (%) | Number of Rooting | Rooting Rate (%) |
|-----------------------|-----------------|------------------|--------------------|--------------------|-------------------|-------------------|------------------|
| #1                    | 2               | First Leaf       | 8                  | 4                  | 50                | 1                 | 12.5             |
|                       |                 | Cotyledon        | 8                  | 1                  | 12.5              | 0                 | 0                |
| #2                    | 2               | First Leaf       | 9                  | 9                  | 100               | 1                 | 11.1             |
|                       |                 | Cotyledon        | 8                  | 0                  | 0                 | 0                 | 0                |
| #3                    | 20              | First Leaf       | 68                 | 45                 | 66.2              | 7                 | 10.3             |
|                       |                 | Cotyledon        | 80                 | 22                 | 27.5              | 2                 | 2.5              |
| #4                    | 5               | First Leaf       | 20                 | 20                 | 100               | 5                 | 25               |
|                       |                 | Cotyledon        | 20                 | 6                  | 30                | 1                 | 5                |
| #5                    | 16              | First Leaf       | 64                 | 48                 | 75                | 5                 | 7.8              |
|                       |                 | Cotyledon        | 64                 | 12                 | 18.8              | 0                 | 0                |
|                       |                 | Hypocotyl        | 32                 | 6                  | 18.8              | 0                 | 0                |
| #6                    | 4               | First Leaf       | 14                 | 13                 | 92.9              | 1                 | 7.1              |
|                       |                 | Cotyledon        | 16                 | 2                  | 12.5              | 0                 | 0                |
|                       |                 | Hypocotyl        | 8                  | 0                  | 0                 | 0                 | 0                |
| #7                    | 5               | First Leaf       | 10                 | 6                  | 60                | 2                 | 20               |
|                       |                 | Cotyledon        | 28                 | 14                 | 50                | 1                 | 3.6              |
|                       |                 | Hypocotyl        | 10                 | 6                  | 60                | 1                 | 10               |
| #8                    | 15              | First Leaf       | 41                 | 6                  | 14.6              | N.D               | N.D              |
|                       |                 | Cotyledon        | 61                 | 3                  | 4.9               | N.D               | N.D              |
|                       |                 | Hypocotyl        | 17                 | 4                  | 23.5              | N.D               | N.D              |
| Total                 | 69              | First Leaf       | 234                | 151                | 69.8*             | 22                | 13.4*            |
|                       |                 | Cotyledon        | 285                | 60                 | 25.5*             | 4                 | 3.3*             |
|                       |                 | Hypocotyl        | 67                 | 16                 | 19.5*             | 1                 | 1.6*             |

\* indicates the mean of shooting/rooting rates obtained from the biological replicates.
