# Supplementary material for: A Reliable Regeneration Method in Genome-Editable Bell Pepper ‘Dempsey’
Source: MDPI journal article supplement (doi:10.3390/horticulturae7090317), 2021-09-16
Supplement: s1 [file s1]

Archive with 1 entries (1 files):
- horticulturae-1320815-supplementary.pdf
